# Supplementary material
Source: Elsevier journal article supplement (https://www.sciencedirect.com/science/article/pii/S0213911122001625)
Supplement: mmc1 [file S0213911122001625:mmc1.doc]

**Apéndice**

**Tabla I**

Modelo saturado de regresión de Cox multivariante para identificar los factores que se asocian a morir en el domicilio (n = 1527)

|  | **B** | **HR (IC95%)** | **p** |
| --- | --- | --- | --- |
| Edad >80 años | 0,286 | 1,33 (1,10-1,61) | 0,003 |
| Sexo masculino | 0,185 | 1,20 (1,01-1,44) | 0,043 |
| Cuidador principal: pareja | 0,001 | 1,00 (0,83-1,21) | 0,991 |
| Trabajador/a familiar: sí | −0,011 | 0,99 (0,83-1,17) | 0,898 |
| Dependencia funcional (Barthel <100) | 1,873 | 6,51 (4,17-10,16) | 0,000 |
| Deterioro cognitivo (Pfeiffer >2) | 0,183 | 1,20 (1,00-1,44) | 0,046 |
| Cáncer: sí | −0,166 | 0,85 (0,71-1,02) | 0,076 |
| *Complejidad*a |  |  |  |
| Clínica física (dificultad manejo síntomas/lesiones) | 0,084 | 1,09 (0,91-1,31) | 0,366 |
| Clínica terapéutica (baja adherencia o dificultad acceso fármacos/técnicas) | −0,044 | 0,96 (0,78-1,17) | 0,669 |
| Psicoemocional emocional (malestar emocional desadaptativo) | 0,046 | 1,05 (0,86-1,28) | 0,652 |
| Psicoemocional personalidad (vulnerabilidad psicológica) | −0,001 | 1,00 (0,82-1,22) | 0,993 |
| Espiritual transcendencia (dificultad para afrontar el futuro) | −0,005 | 1,00 (0,75-1,33) | 0,975 |
| Espiritual conexión (aislamiento y ruptura de relaciones) | −0,498 | 0,61 (0,41-0,91) | 0,015 |
| Espiritual sentido (dificultad de encontrar sentido a la situación) | −0,069 | 0,93 (0,73-1,19) | 0,577 |
| Sociofamiliar relación (malestar relacional familiar) | −0,098 | 0,91 (0,71-1,16) | 0,431 |
| Sociofamiliar emocional (malestar emocional desadaptativo del cuidador) | −0,040 | 0,96 (0,77-1,20) | 0,722 |
| Sociofamiliar práctica (dificultad manejo necesidades básicas del paciente) | 0,087 | 1,09 (0,89-1,34) | 0,401 |
| Sociofamiliar externa (falta apoyo efectivo externo al núcleo de convivencia) | −0,238 | 0,79 (0,66-0,94) | 0,008 |
| Sociofamiliar económica (malestar financiero/dificultad para contratar ayuda) | −0,143 | 0,87 (0,65-1,15) | 0,323 |
| Ética deseo anticipar muerte (deseo de avanzar muerte en cualquier grado) | −0,022 | 0,98 (0,68-1,41) | 0,908 |
| Ética adecuación terapéutica (dificultad en toma de decisiones clínicas) | 0,234 | 1,26 (1,03-1,55) | 0,027 |
| Ética información (dificultad manejo información de diagnóstico/pronóstico) | −0,137 | 0,87 (0,66-1,16) | 0,341 |
| Muerte ubicación (dificultad en planificación del lugar donde morir) | −0,590 | 0,56 (0,46-0,67) | 0,000 |
| Muerte últimos días (dificultad manejo de la situación de últimos días) | 0,759 | 2,14 (1,55-2,95) | 0,000 |
| Muerte duelo (presencia de factores de riesgo en el duelo) | 0,005 | 1,01 (0,82-1,24) | 0,960 |

HR: *hazard ratio;* IC95%: intervalo de confianza del 95%.

aIncluye los pacientes con complejidad asistencial media o alta en la valoración inicial.
